# Supplementary material for: DNA origami-templated individual gold nanoclusters: probing their photophysical dynamics using single-molecule fluorescence spectroscopy
Source: Royal Society of Chemistry journal article supplement (doi:10.1039/d4nr04887c), 2025-01-01
Supplement: d4nr04887c1.pdf [file d4nr04887c1.pdf]

## Supporting Information

### DNA Origami-Templated Individual Gold Nanocluster: Probing The Photophysical Dynamics Using Single Molecule Fluorescence Spectroscopy

Shikha Rai, Vishaldeep Kaur, Charanleen Kaur, Mridu Sharma and Tapasi Sen

Institute of Nano Science and Technology, Sector-81, Mohali, Punjab -140306, India

\*E-mail: [tapasi@inst.ac.in](mailto:tapasi@inst.ac.in)

**Table S1.** Poly-C strand sequences

|        |                                                            |
|--------|------------------------------------------------------------|
| Poly-c | 5-TTTCATTTGGTCAATAACCTGTTTATATCGCGCCCCCCCCCCCCCCCCCCCCC-3' |
|--------|------------------------------------------------------------|

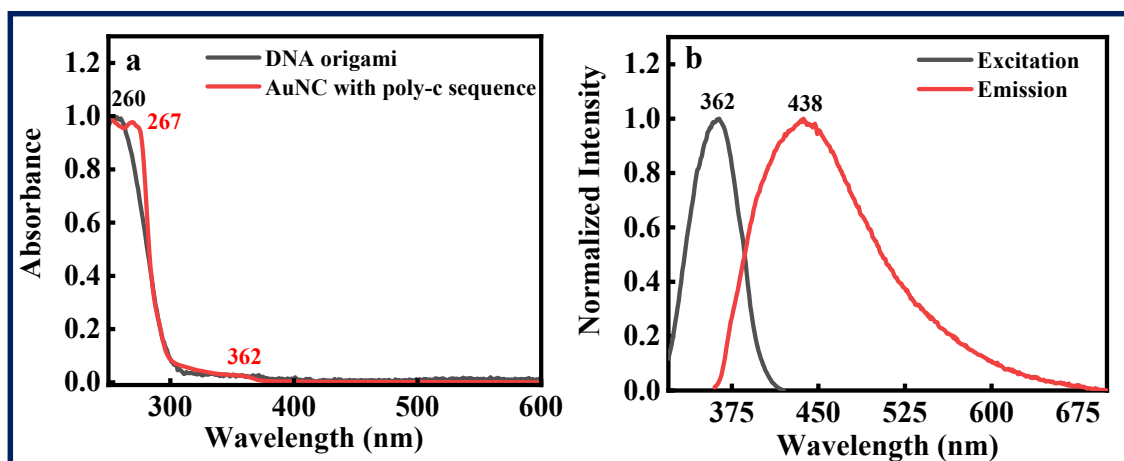

**Figure S1.** (a) UV-Vis spectra of the DNA origami and Au NC with poly-C sequence, (b) Fluorescence spectra of the as-prepared Au NCs with poly-C sequence.

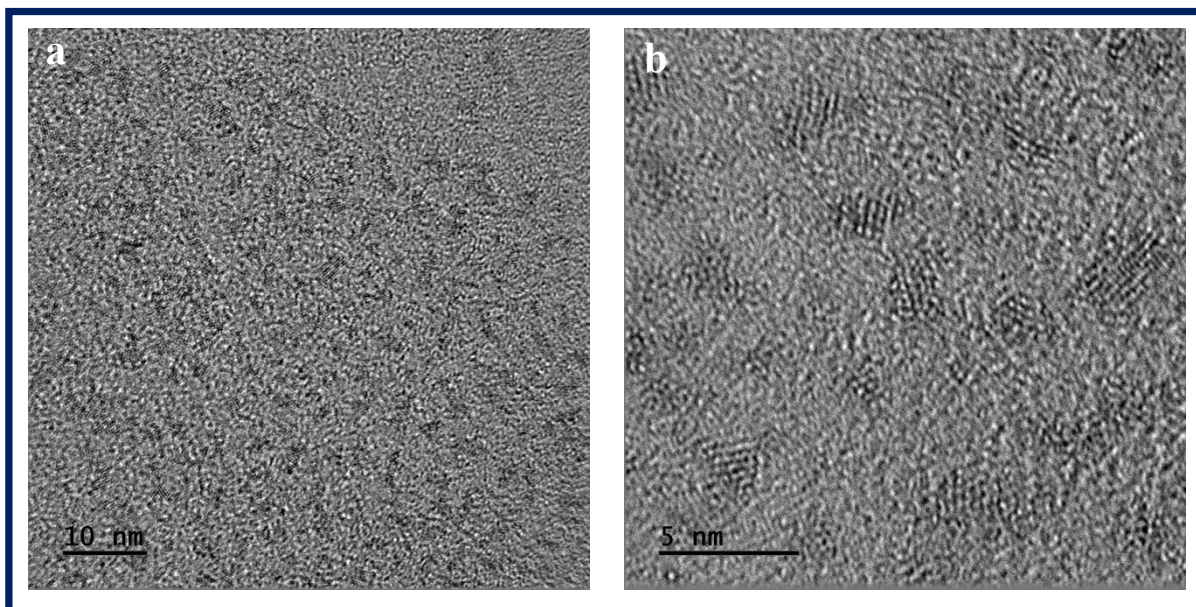

**Figure S2.** (a) TEM images of Au NCs synthesized by poly-C sequence, and (b) HRTEM images.

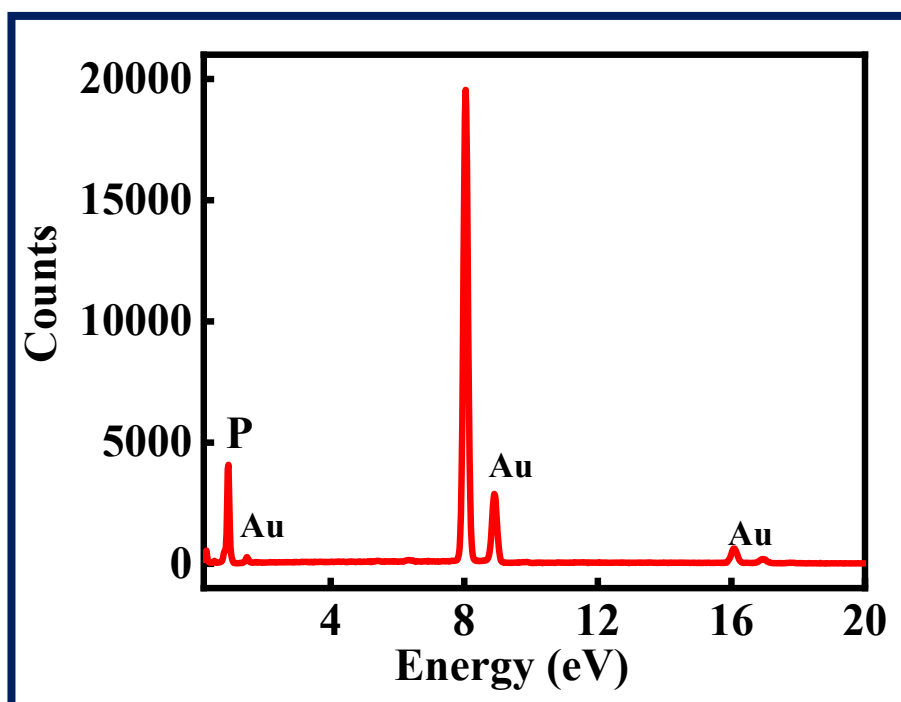

**Figure S3.** EDX spectrum of Au NC synthesized by poly-C sequence.<sup>1</sup>

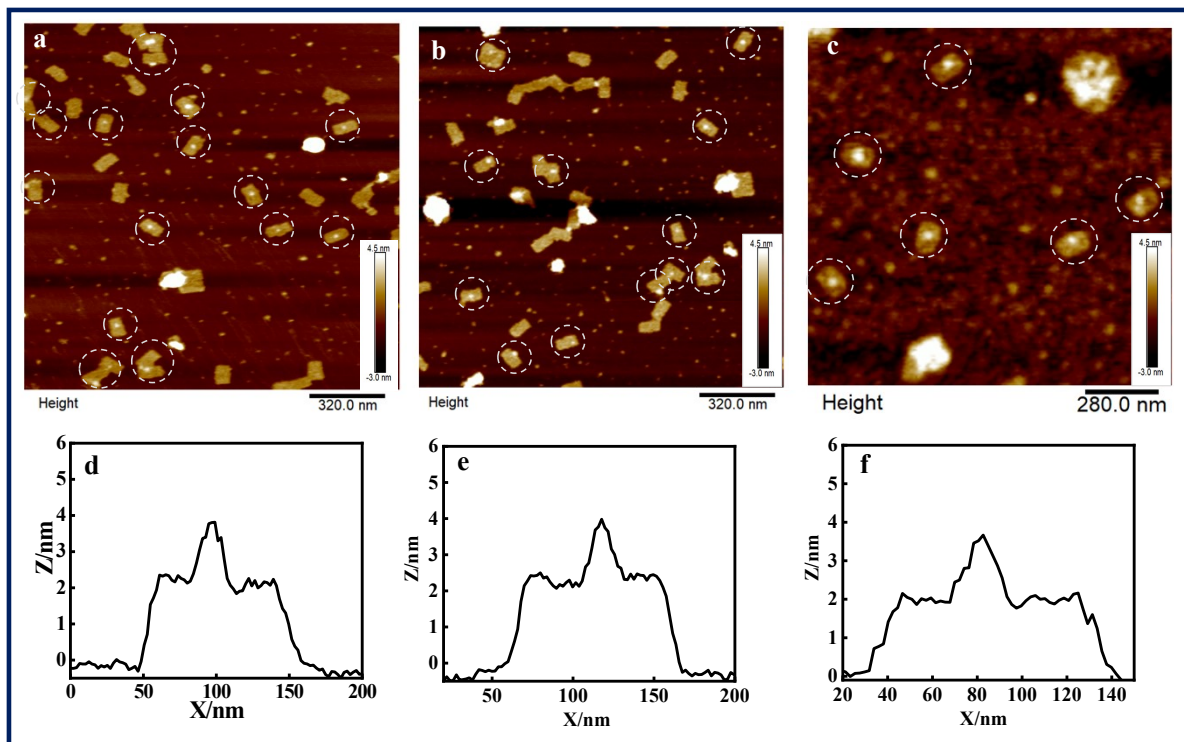

**Figure S4.** (a,b and c) AFM images of Au NC on DNA origami, and (d,e, and f) corresponding AFM height profiles.

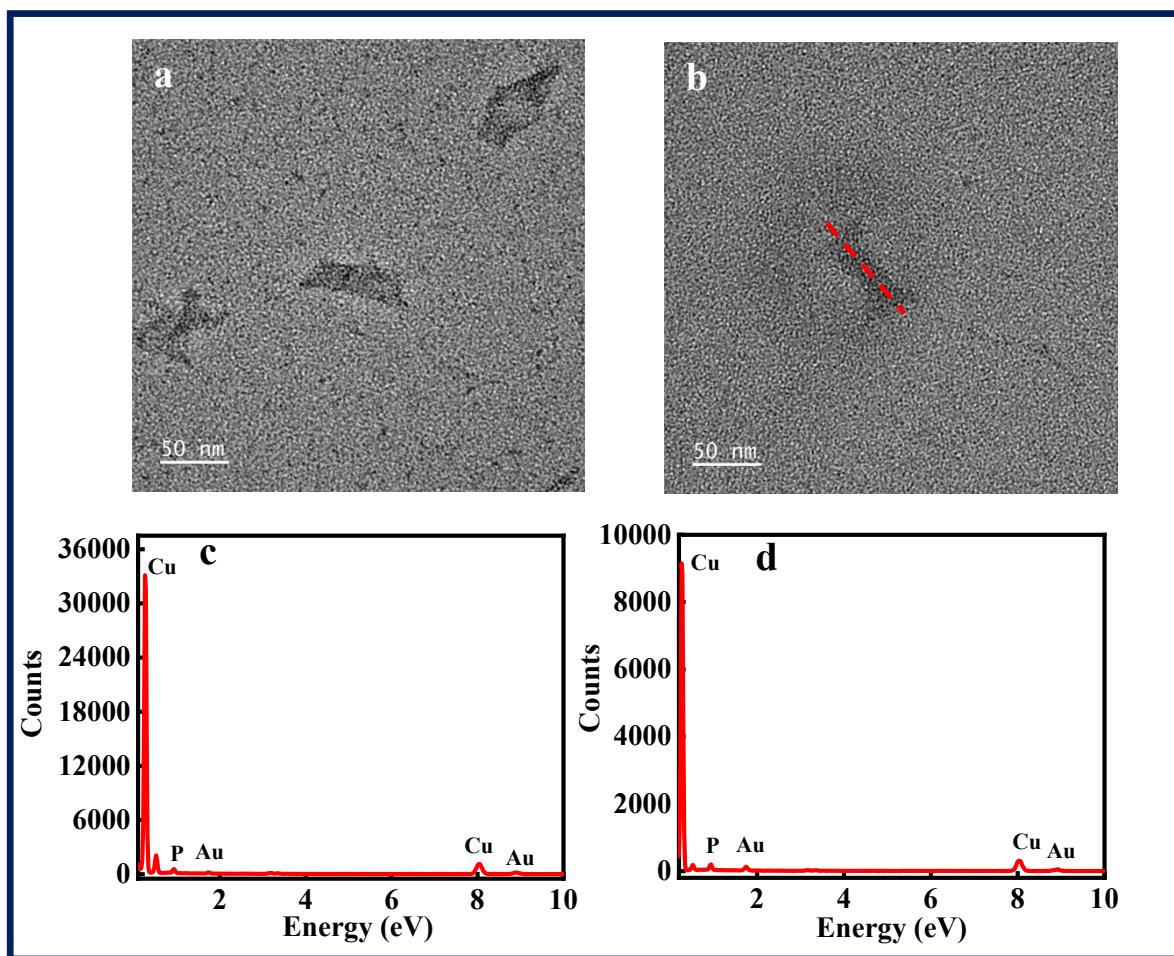

**Figure S5.** (a and b) TEM images of Au NC on DNA origami monomer, (c) EDX spectrum, and (d) Line scan EDX.

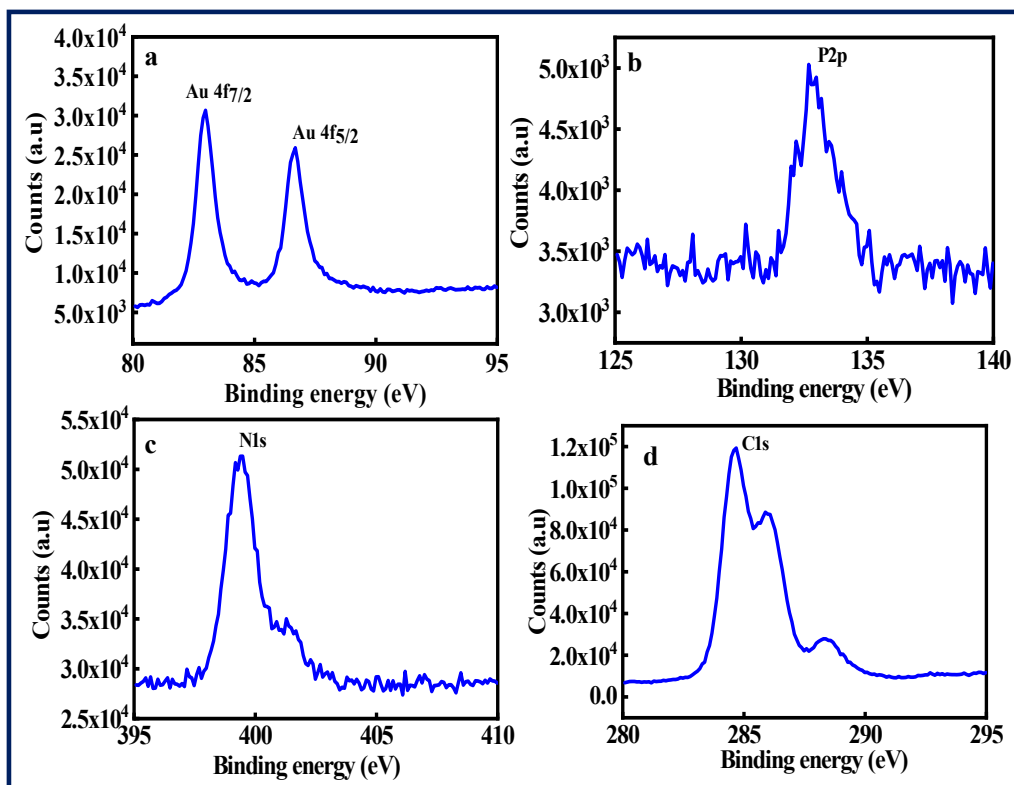

**Figure S6.** XPS spectrum of Au NC on DNA origami.<sup>2</sup>

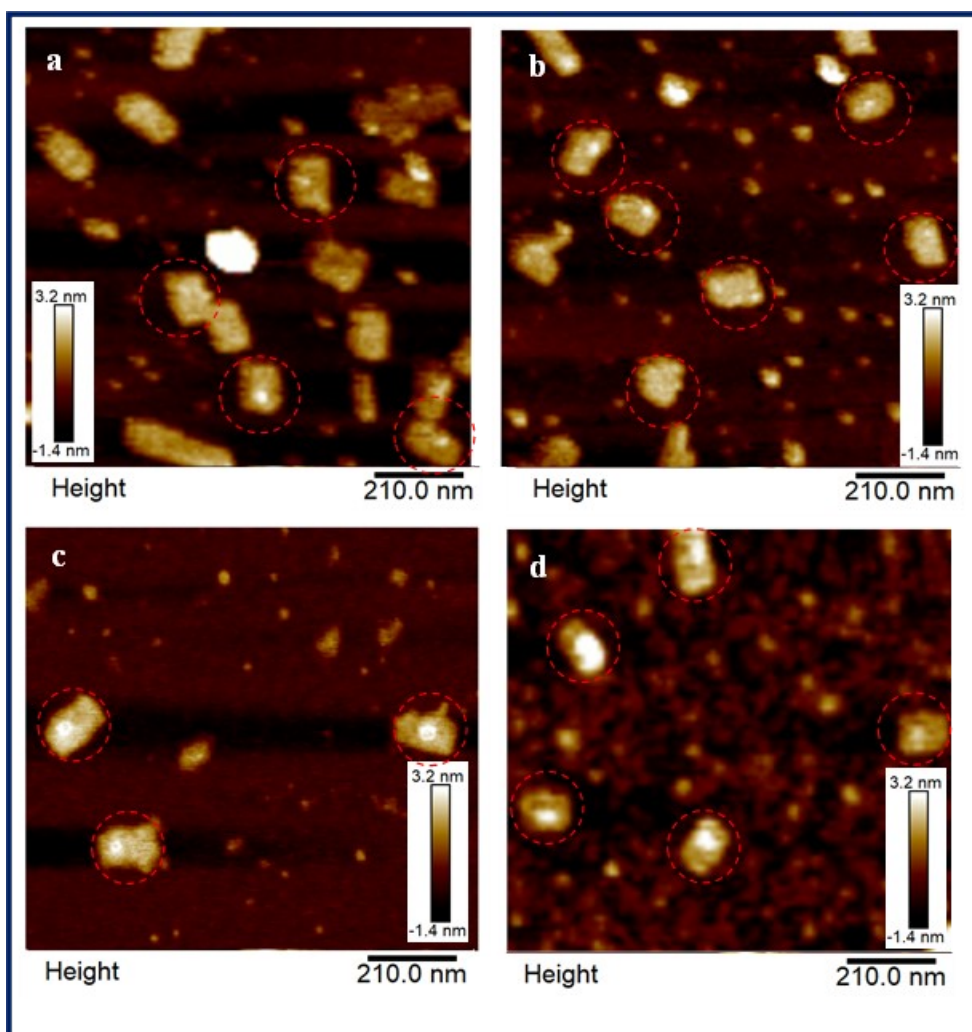

**Figure S7.** AFM images of Au NC on DNA origami (a and b) with different Au concentrations of 1  $\mu\text{M}$  and 4  $\mu\text{M}$ , respectively, and (c and d) with different temperatures of 35  $^{\circ}\text{C}$  and 45  $^{\circ}\text{C}$ , respectively.



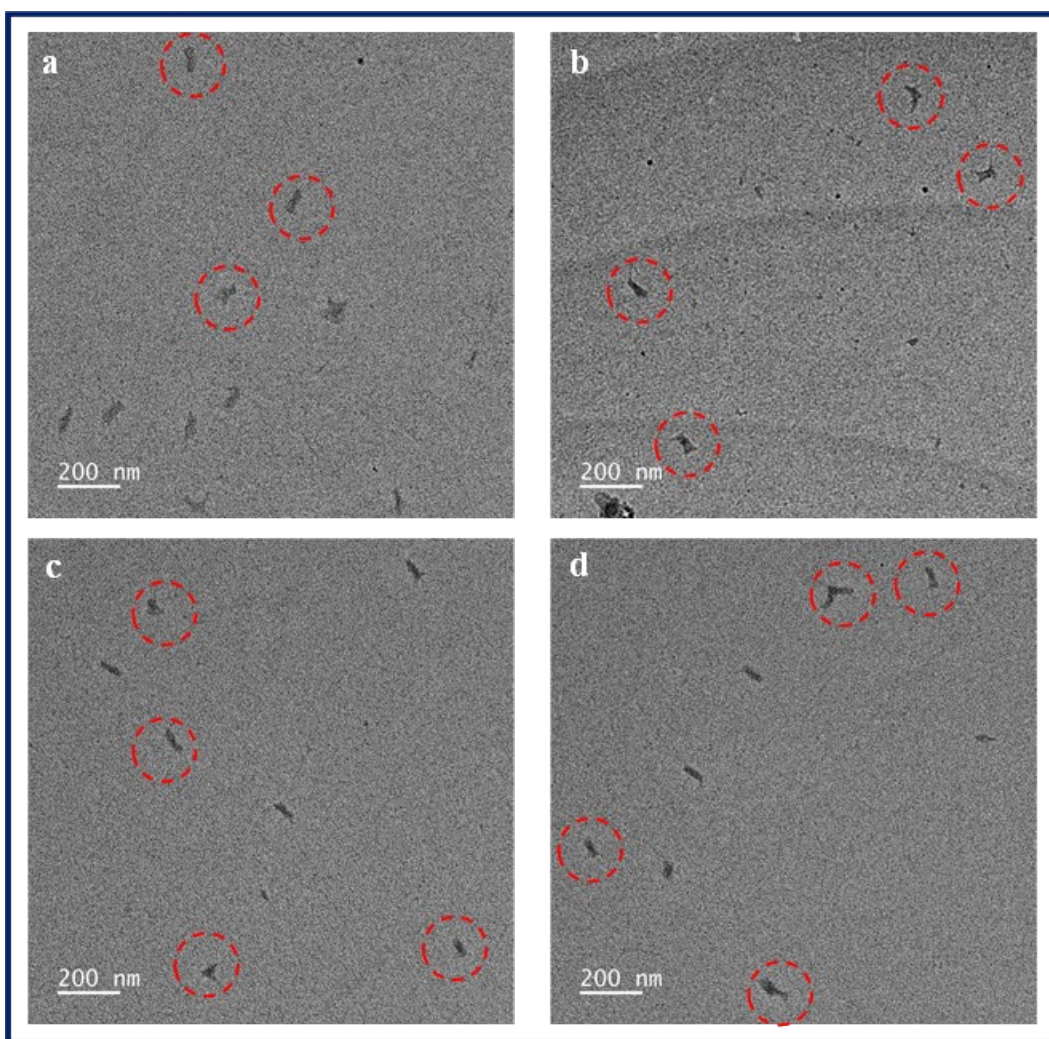

**Figure S8.** TEM images of Au NC on DNA origami (a and b) with different Au concentrations of 1  $\mu\text{M}$  and 4  $\mu\text{M}$ , respectively, and (c and d) with different temperatures of 35  $^{\circ}\text{C}$  and 45  $^{\circ}\text{C}$ , respectively.

**Table S2.** Biotin modified staple strand sequences on DNA origami.

| Name    | Sequence 5' to 3'                           |
|---------|---------------------------------------------|
| Bio-11  | Biotin- TTGAGAATAGCTTTTGC GGGATCGTCGGGTAGCA |
| Bio-27  | Biotin-TTG GAAAGCGACCAGGCGGATAAGTGAATAGGTG  |
| Bio-188 | Biotin- TTTGGTTTTTAACGTCAAAGGGCGAAGAACCATC  |
| Bio-205 | Biotin- GCCAACAGTCACCTTGCTGAACCTGTTGGCAA    |

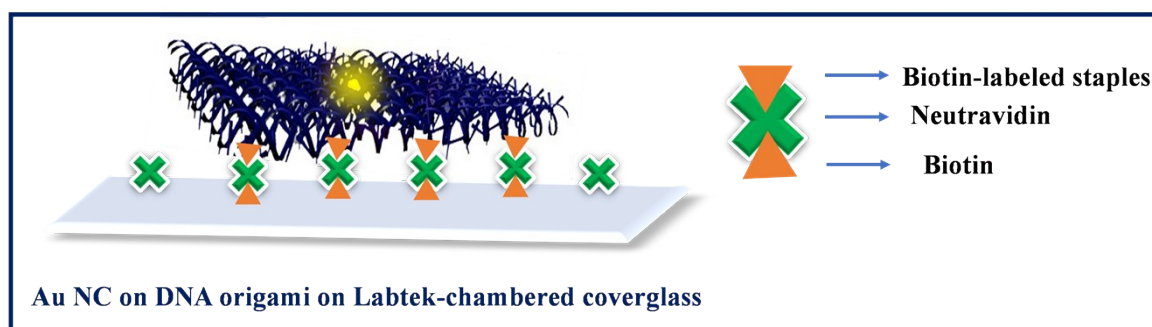

**Scheme S1.** Immobilization of an Au NC on DNA origami on a Labtek-Chambered coverglass using Biotin-Neutravidin linkage.

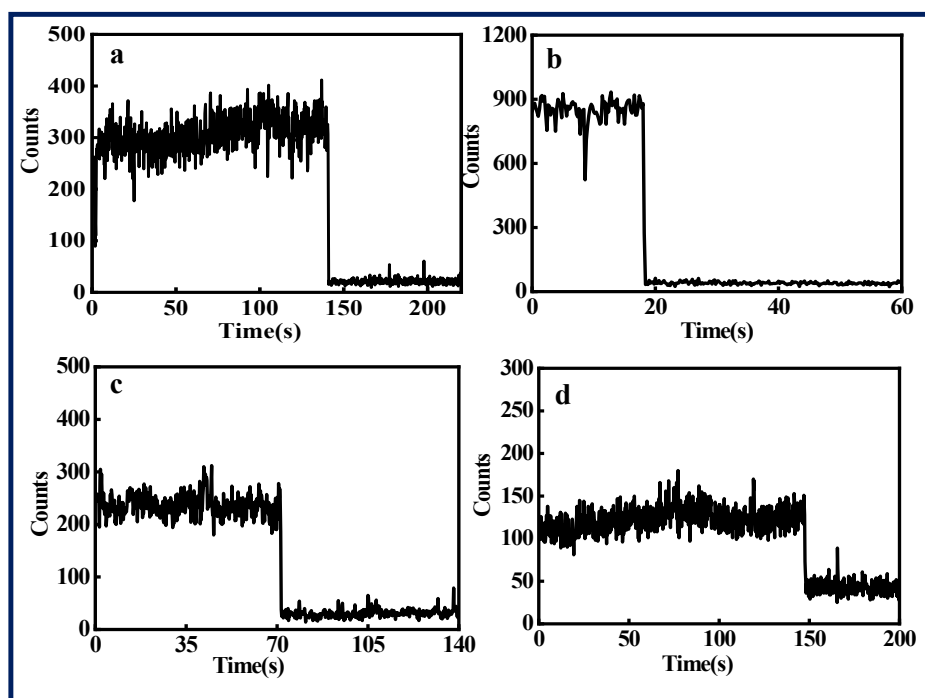

**Figure S9.** Time trace profiles for single-step photobleaching of Au NC on DNA origami.

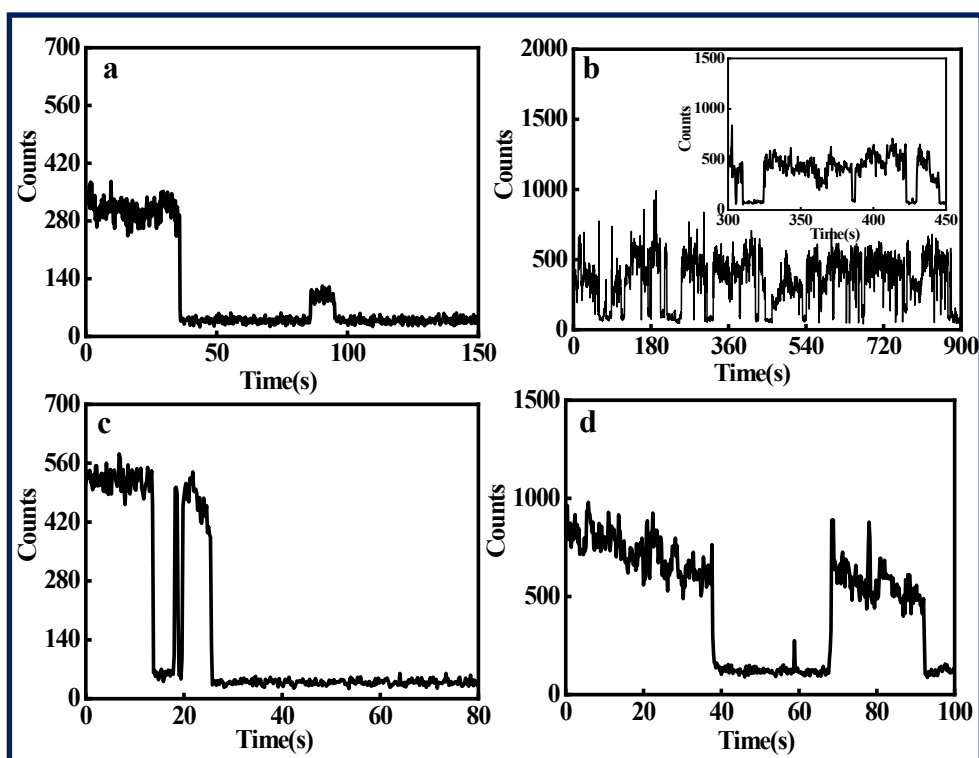

**Figure S10.** Time trace profiles showing blinking of Au NC on DNA origami.

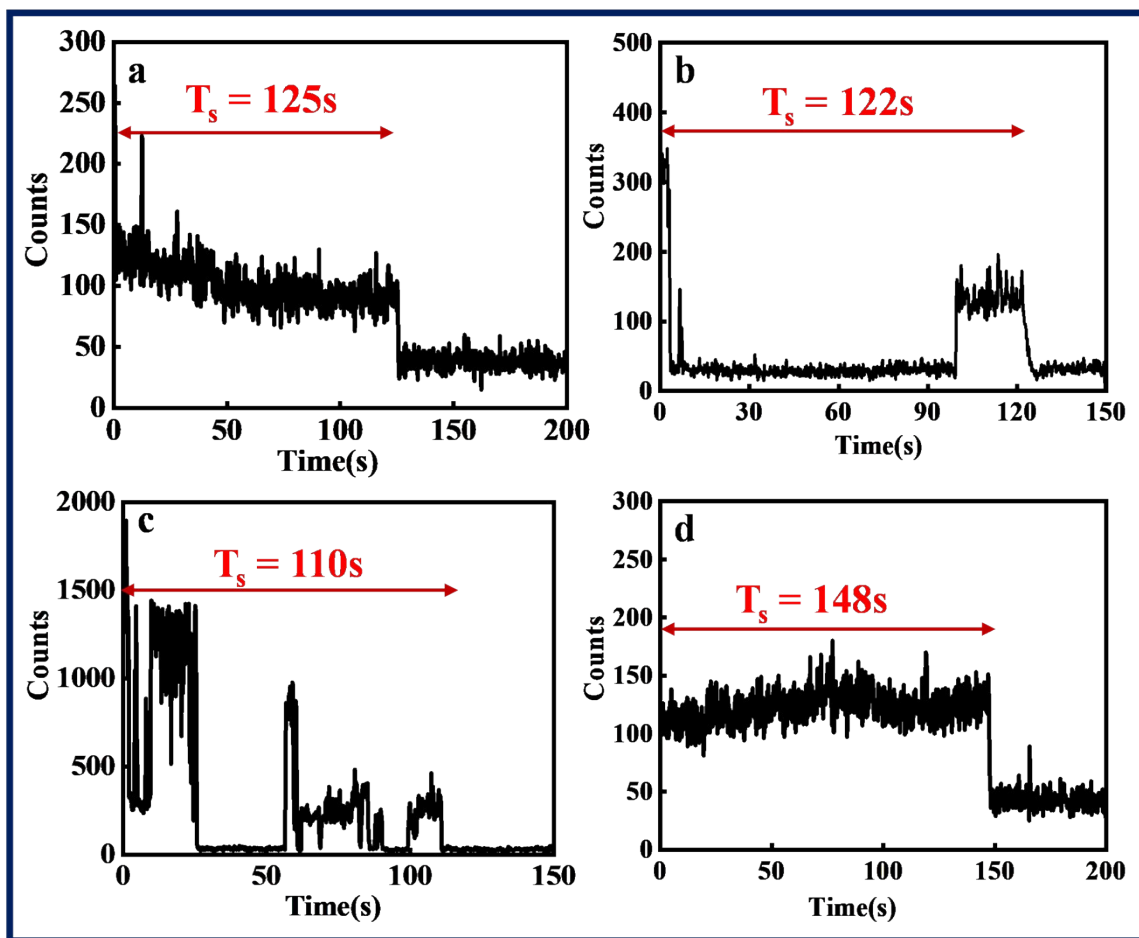

**Figure S11.** Fluorescence time traces of Au NC on DNA origami indicating their survival times.

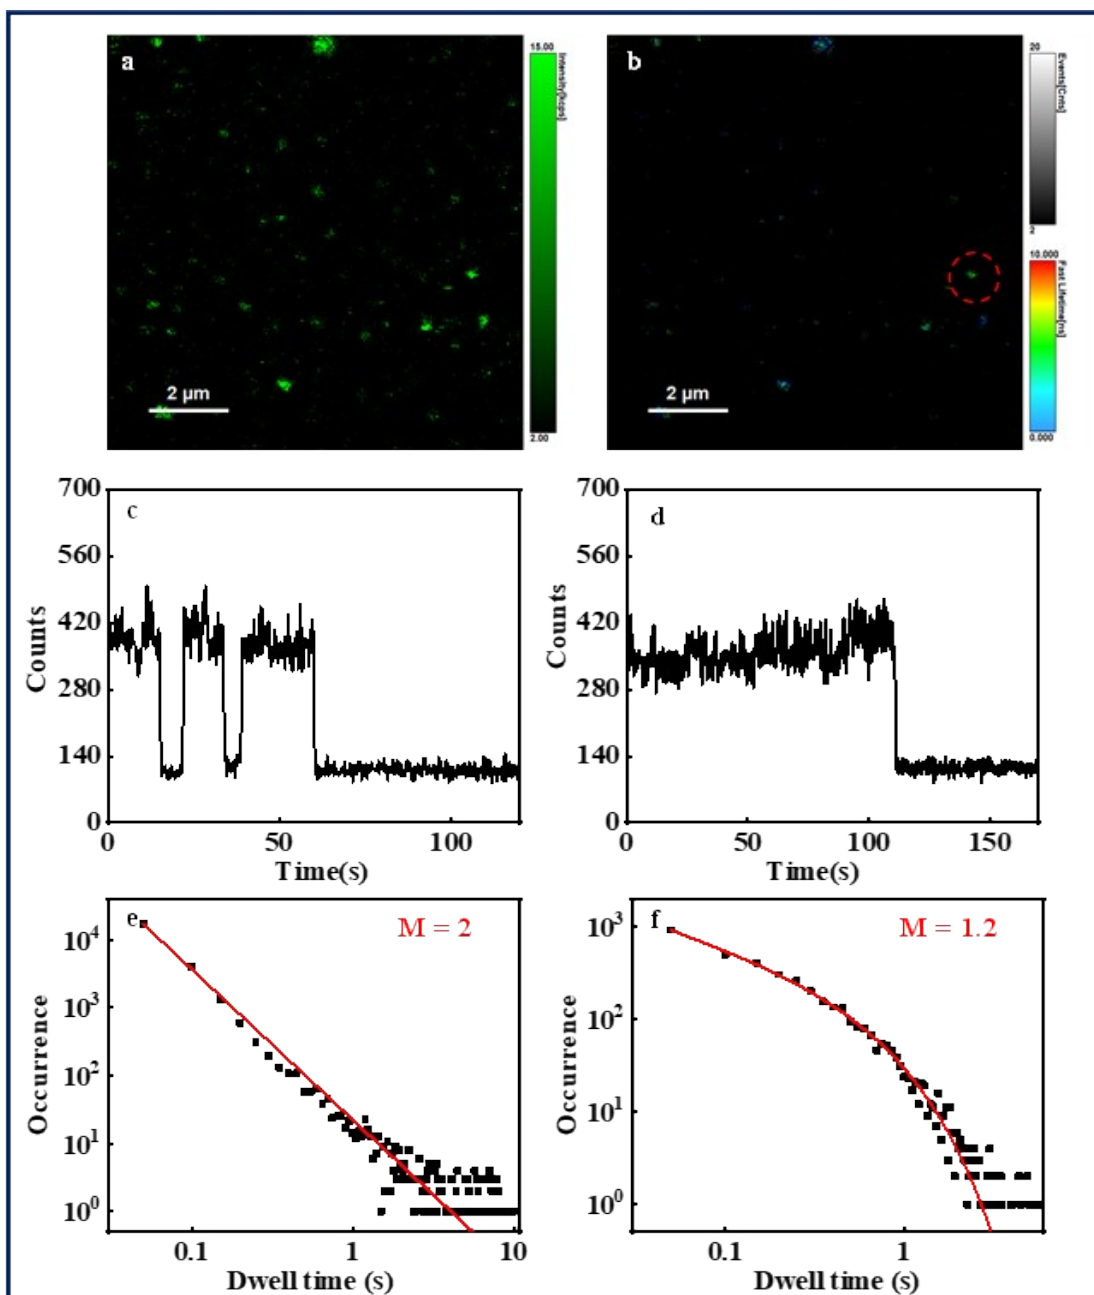

**Figure S12.** Single-molecule confocal fluorescence measurements with  $0.035 \mu\text{W}$  laser intensity (a) fluorescence intensity images, (b) FLIM images, (c and d) fluorescence transient profiles, and statistical distribution for (e) on-events, and (f) off-events of Au NC on DNA origami.

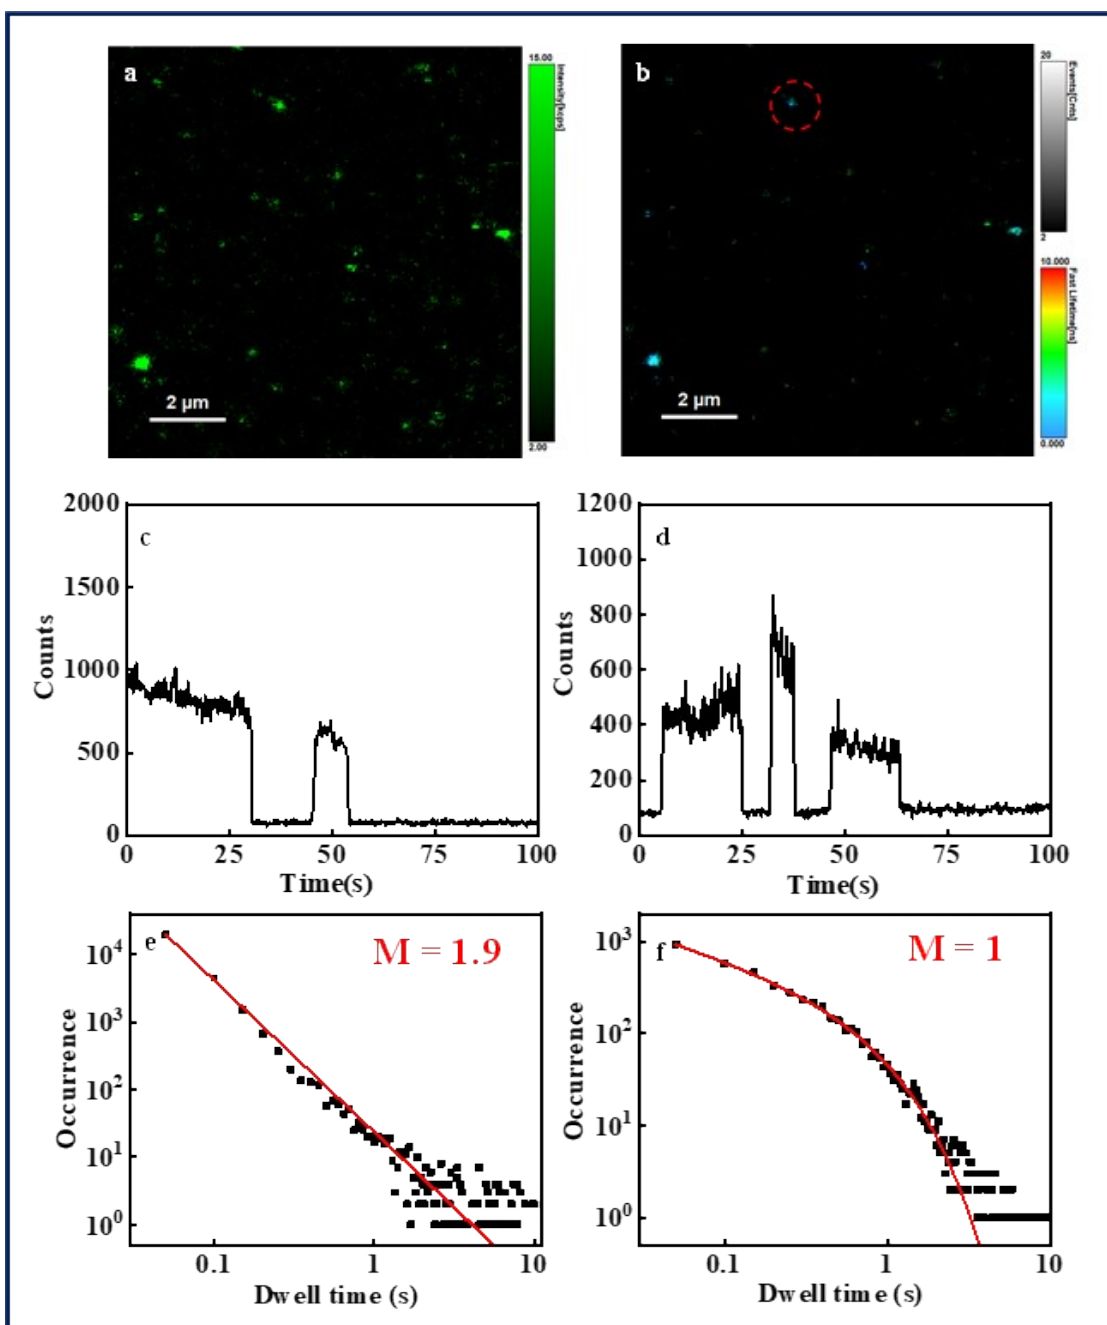

**Figure S13.** Single-molecule confocal fluorescence measurements with  $0.14 \mu\text{W}$  laser intensity (a) fluorescence intensity images, (b) FLIM images, (c and d) fluorescence transient profiles, and statistical distribution for (e) on-events, and (f) off-events of Au NC on DNA origami.

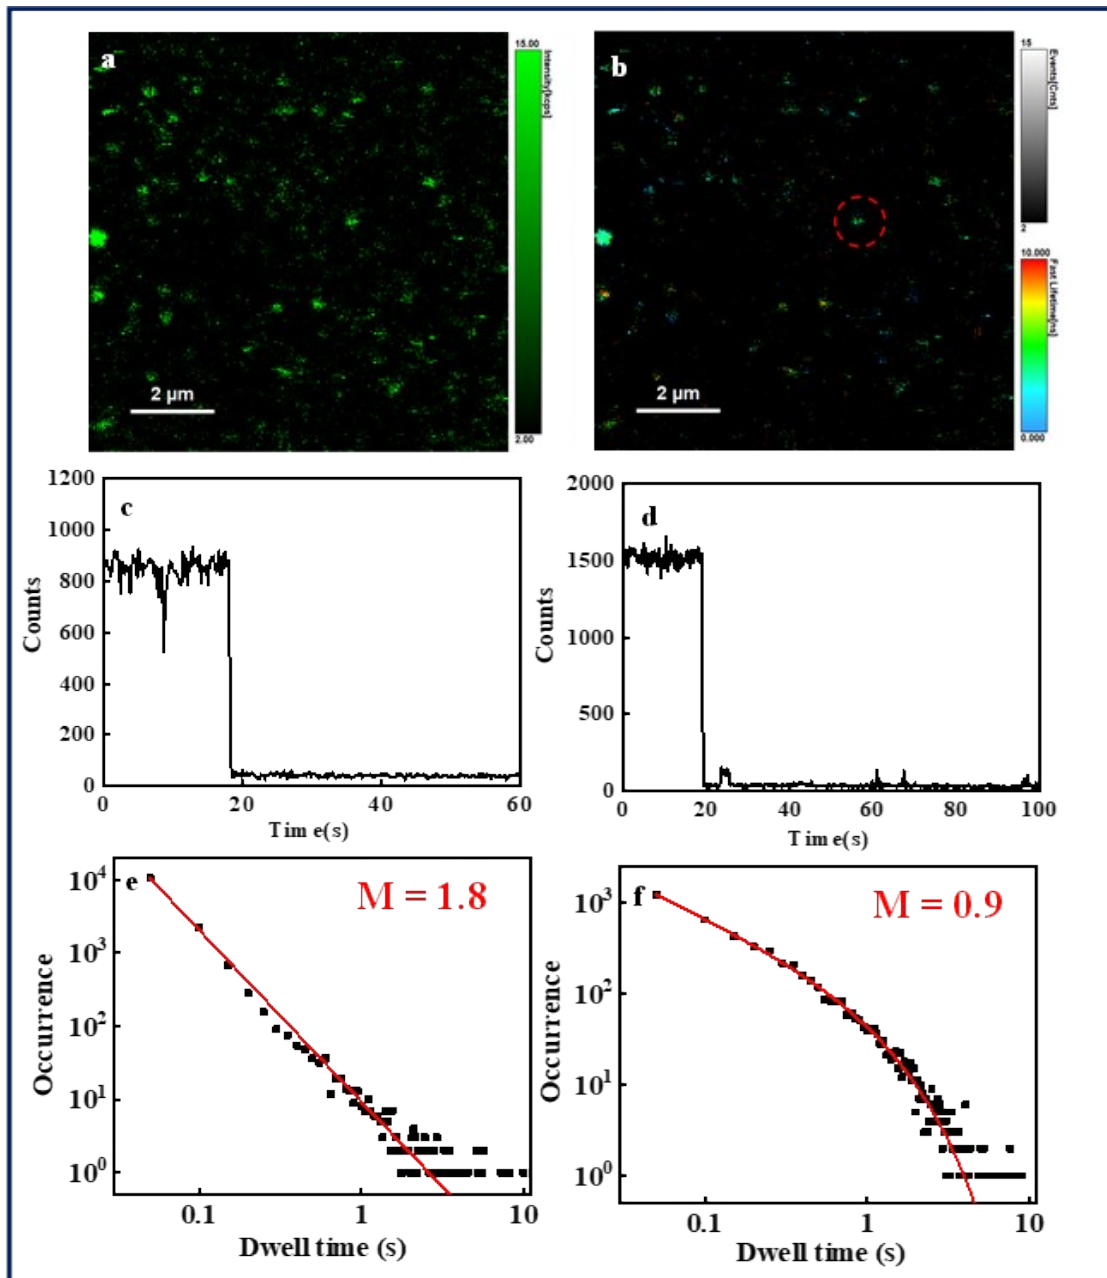

**Figure S14.** Single-molecule confocal fluorescence measurements with  $0.28 \mu\text{W}$  laser intensity (a) fluorescence intensity images, (b) FLIM images, (c and d) fluorescence transient, and statistical distribution for (e) on-events, and (f) off-events of Au NC on DNA origami.



**Table S3.** The comparative analysis of the survival times of the clusters with our designed Au NC on DNA origami and previously reported NCs.

| <b>Cluster</b>                          | <b>Survival time</b> | <b>Reference</b> |
|-----------------------------------------|----------------------|------------------|
| Ag NC                                   | 65 s                 | 3                |
| AuAg NC                                 | 218 s                | 3                |
| Au NC                                   | 18 s                 | 2                |
| Ag NC                                   | 15 s                 | 4                |
| DNA-Hosted Silver Nanoclusters          | 360 s                | 5                |
| Au NC                                   | 5 s                  | 6                |
| Au NC synthesized with poly-C sequences | 85 s                 | This work        |
| Au NC on DNA origami                    | 880 s                | This work        |

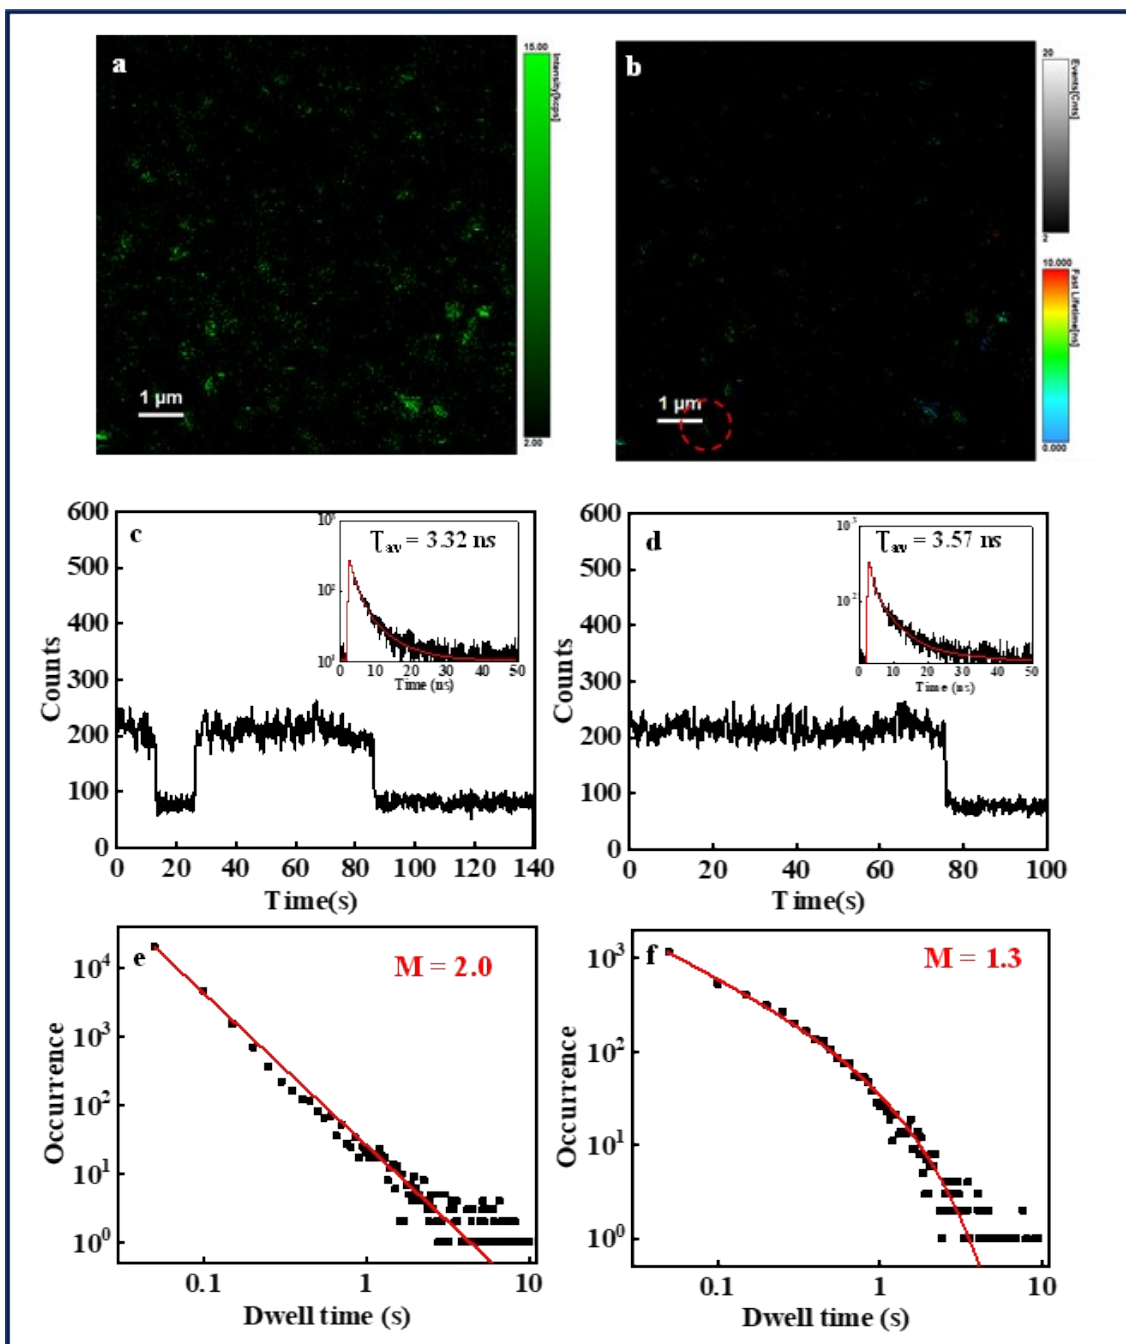

**Figure S15.** Single-molecule confocal fluorescence measurements (a) fluorescence intensity images, (b) FLIM images, (c and d) fluorescence transient profiles (inset graph shows fluorescence decay time ( $T_{av}$  value) of Au NCs synthesized by poly-C sequences), and statistical distribution for (e) on-events, and (f) off-events of Au NCs synthesized by poly-C sequences.

## References:

1. S. Chakraborty, S. Babanova, R. C. Rocha, A. Desireddy, K. Artyushkova, A. E. Boncella, P. Atanassov and J. S. Martinez, *J. Am. Chem. Soc.*, 2015, **137**, 11678-11687.
2. A. Yadav, N. C. Verma, C. Rao, P. M. Mishra, A. Jaiswal and C. K. Nandi, *J. Phys. Chem. Lett.*, 2020, **11**, 5741-5748.
3. Rashi, V. Kaur, A. Devi, D. Bain, T. Sen and A. Patra, *J. Phys. Chem. Lett.*, 2023, **14**, 10166-10172.
4. A. Yadav, K. Kaushik, S. Sharma, F. Anjum and C. K. Nandi, *ACS Appl. Nano Mater.*, 2022, **5**, 9260-9265.
5. S. S. Oemrawsingh, N. Markešević, E. G. Gwinn, E. R. Eliel and D. Bouwmeester, *J. Phys. Chem. C*, 2012, **116**, 25568-25575.
6. C. Yuan, W.-C. Chou, J. Tang, C. Lin, W. Chang, J. Shen and D. Chuu, *Opt. Express.*, 2009, **17**, 16111-16118.
